# Supplementary material
Source: PubMed Central journal article supplement (PMC2896678)
Supplement: 426479.f2.pdf [file 426479.f2.pdf]

Sheet1

| Gene   | Degree | Eigenvector | Betweenness | Closeness |
|--------|--------|-------------|-------------|-----------|
| TNF    | 1      | 1           | 1           | 1         |
| NFKB1  | 2      | 2           | 2           | 2         |
| IL6    | 3      | 3           | 3           | 3         |
| IL8    | 4      | 5           | 6           | 4         |
| IL10   | 5      | 4           | 4           | 5         |
| IL4    | 6      | 6           | 5           | 6         |
| MAPK1  | 7      | 9           | 9           | 7         |
| IL2    | 8      | 7           | 8           | 8         |
| VEGFA  | 9      | 10          | 10          | 9         |
| TP53   | 10     | 8           | 7           | 10        |
| BCL2   | 11     | 13          | 13          | 11        |
| AKT1   | 12     | 11          | 12          | 12        |
| MAPK8  | 13     | 14          | 14          | 13        |
| INS    | 14     | 12          | 11          | 14        |
| MAPK14 | 15     | 15          | 18          | 15        |
| CSF2   | 16     | 18          | 17          | 16        |
| FAS    | 17     | 17          | 16          | 17        |
| CCL2   | 18     | 19          | 19          | 18        |
| IFNA1  | 19     | 16          | 15          | 19        |
| EGFR   | 20     | 20          | 23          | 20        |
| JUND   | 21     | 21          | 22          | 21        |
| KITLG  | 22     | 24          | 27          | 22        |
| CCL5   | 23     | 23          | 21          | 23        |
| CD4    | 24     | 22          | 20          | 24        |
| EGF    | 25     | 25          | 26          | 25        |
| STAT3  | 26     | 26          | 25          | 26        |
| CD40   | 27     | 27          | 29          | 27        |
| BAX    | 28     | 31          | 37          | 28        |
| CXCR4  | 29     | 29          | 30          | 29        |
| SOS1   | 30     | 33          | 33          | 30        |
| SRC    | 31     | 34          | 34          | 31        |
| CRP    | 32     | 28          | 24          | 32        |
| CCND1  | 33     | 30          | 31          | 33        |
| IL13   | 34     | 35          | 36          | 34        |
| MYC    | 35     | 36          | 32          | 35        |
| CTNNB1 | 36     | 32          | 28          | 36        |
| NOS2   | 37     | 37          | 35          | 37        |
| CSF3   | 38     | 41          | 44          | 38        |
| TCEAL1 | 39     | 38          | 43          | 39        |
| CD44   | 40     | 42          | 42          | 40        |
| JUN    | 41     | 43          | 46          | 41        |
| IL5    | 42     | 39          | 40          | 42        |
| CD40LG | 43     | 46          | 57          | 43        |
| STAT1  | 44     | 40          | 39          | 44        |
| CD28   | 45     | 44          | 41          | 45        |
| TF     | 46     | 47          | 48          | 46        |
| CD14   | 47     | 49          | 53          | 47        |
| NUDT6  | 48     | 48          | 55          | 48        |
| SP1    | 49     | 45          | 38          | 49        |
| IL15   | 50     | 53          | 58          | 50        |

Sheet1

|         |     |     |     |     |
|---------|-----|-----|-----|-----|
| CDKN2A  | 51  | 51  | 50  | 51  |
| BCL2L1  | 52  | 57  | 70  | 52  |
| TNFSF10 | 53  | 50  | 47  | 53  |
| IL3     | 54  | 59  | 65  | 54  |
| CD34    | 55  | 60  | 60  | 55  |
| IL18    | 56  | 52  | 45  | 56  |
| TIMP1   | 57  | 54  | 54  | 57  |
| KLK3    | 58  | 55  | 51  | 58  |
| FASLG   | 59  | 62  | 62  | 59  |
| RB1     | 60  | 56  | 49  | 60  |
| TLR4    | 61  | 61  | 59  | 61  |
| CAT     | 62  | 58  | 52  | 62  |
| PPARG   | 63  | 65  | 69  | 63  |
| S100A9  | 64  | 64  | 61  | 64  |
| TG      | 65  | 63  | 56  | 65  |
| ITGAM   | 66  | 69  | 81  | 66  |
| TGFB1   | 67  | 67  | 66  | 67  |
| ITGB2   | 68  | 66  | 64  | 68  |
| SNORA62 | 69  | 68  | 67  | 69  |
| CD86    | 70  | 73  | 85  | 70  |
| PPA1    | 71  | 72  | 68  | 71  |
| CXCL10  | 72  | 71  | 74  | 72  |
| ISG20   | 73  | 74  | 75  | 73  |
| TMEM37  | 74  | 70  | 63  | 74  |
| CD80    | 75  | 76  | 84  | 75  |
| EPO     | 76  | 78  | 83  | 76  |
| CD8A    | 77  | 75  | 72  | 77  |
| MS4A1   | 78  | 77  | 73  | 78  |
| PRL     | 79  | 79  | 76  | 79  |
| ERBB2   | 80  | 82  | 77  | 80  |
| SSSCA1  | 81  | 81  | 82  | 81  |
| MPO     | 82  | 84  | 87  | 82  |
| SYT1    | 83  | 83  | 89  | 83  |
| HSPA4   | 84  | 80  | 79  | 84  |
| STAT5A  | 85  | 88  | 102 | 85  |
| KIT     | 86  | 89  | 97  | 86  |
| PTPRC   | 87  | 87  | 80  | 87  |
| LTA     | 88  | 86  | 78  | 88  |
| ELANE   | 89  | 90  | 93  | 89  |
| CD38    | 90  | 92  | 96  | 90  |
| CD69    | 91  | 95  | 100 | 91  |
| CCR5    | 92  | 91  | 92  | 92  |
| NFKBIA  | 93  | 99  | 118 | 93  |
| ICAM1   | 94  | 102 | 112 | 94  |
| PTPN11  | 95  | 94  | 86  | 95  |
| FOS     | 96  | 96  | 98  | 96  |
| VWF     | 97  | 97  | 91  | 97  |
| PAG1    | 98  | 85  | 71  | 98  |
| TLR2    | 99  | 98  | 105 | 99  |
| PCNA    | 100 | 101 | 107 | 100 |
| PARP1   | 101 | 100 | 101 | 101 |

Sheet1

|          |     |     |     |     |
|----------|-----|-----|-----|-----|
| EP300    | 102 | 93  | 88  | 102 |
| CSF1     | 103 | 106 | 119 | 103 |
| NCAM1    | 104 | 104 | 104 | 104 |
| IL17A    | 105 | 108 | 125 | 105 |
| RHOA     | 106 | 110 | 106 | 106 |
| VIM      | 107 | 105 | 94  | 107 |
| NGF      | 108 | 109 | 109 | 108 |
| TNFSF11  | 109 | 114 | 127 | 109 |
| NR3C1    | 110 | 107 | 99  | 110 |
| RHOD     | 111 | 111 | 111 | 111 |
| JAK2     | 112 | 112 | 103 | 112 |
| HSP90AA1 | 113 | 103 | 90  | 113 |
| CD68     | 114 | 115 | 113 | 114 |
| PTEN     | 115 | 113 | 114 | 115 |
| FCGR3B   | 116 | 116 | 124 | 116 |
| SPP1     | 117 | 117 | 116 | 117 |
| MME      | 118 | 120 | 115 | 118 |
| CD36     | 119 | 118 | 108 | 119 |
| RPSA     | 120 | 122 | 121 | 120 |
| IL7      | 121 | 123 | 131 | 121 |
| C3       | 122 | 121 | 110 | 122 |
| CXCR3    | 123 | 125 | 146 | 123 |
| MBP      | 124 | 126 | 130 | 126 |
| PECAM1   | 125 | 130 | 149 | 124 |
| VDR      | 126 | 128 | 128 | 125 |
| IL11     | 127 | 134 | 181 | 127 |
| TPO      | 128 | 133 | 141 | 128 |
| SOAT1    | 129 | 132 | 153 | 129 |
| YY1      | 130 | 127 | 117 | 130 |
| PTK2B    | 131 | 138 | 155 | 131 |
| MCL1     | 132 | 139 | 169 | 132 |
| HMOX1    | 133 | 129 | 120 | 133 |
| CXCL12   | 134 | 148 | 175 | 134 |
| CFH      | 135 | 119 | 95  | 135 |
| TNFRSF8  | 136 | 150 | 195 | 136 |
| LEP      | 137 | 140 | 145 | 137 |
| CNTN2    | 138 | 136 | 135 | 138 |
| CD83     | 139 | 144 | 184 | 139 |
| RAF1     | 140 | 142 | 172 | 140 |
| OSM      | 141 | 156 | 202 | 141 |
| LIF      | 142 | 141 | 142 | 142 |
| CISH     | 143 | 146 | 158 | 143 |
| ITGAX    | 144 | 157 | 213 | 144 |
| DFFB     | 145 | 143 | 132 | 145 |
| CXCL9    | 146 | 124 | 122 | 146 |
| CCR7     | 147 | 145 | 148 | 147 |
| CCL11    | 148 | 147 | 150 | 148 |
| BCR      | 149 | 135 | 129 | 149 |
| SYK      | 150 | 161 | 198 | 150 |
| SCYL1    | 151 | 160 | 196 | 151 |
| GH1      | 152 | 155 | 176 | 152 |

Sheet1

|           |     |     |     |     |
|-----------|-----|-----|-----|-----|
| PRF1      | 153 | 137 | 136 | 153 |
| FPR1      | 154 | 151 | 139 | 154 |
| CD2       | 155 | 159 | 154 | 155 |
| PSG2      | 156 | 131 | 123 | 156 |
| MAP2K1    | 157 | 165 | 215 | 157 |
| BDNF      | 158 | 154 | 143 | 158 |
| PTPN6     | 159 | 163 | 160 | 159 |
| MDM2      | 160 | 168 | 205 | 160 |
| CDK2      | 161 | 153 | 138 | 161 |
| CD1A      | 162 | 164 | 179 | 162 |
| TNFRSF11B | 163 | 173 | 225 | 163 |
| CDC42     | 164 | 171 | 178 | 164 |
| AXPC1     | 165 | 158 | 144 | 165 |
| SLPI      | 166 | 166 | 188 | 166 |
| NDUFB6    | 167 | 149 | 126 | 167 |
| KRIT1     | 168 | 152 | 133 | 168 |
| CRH       | 169 | 162 | 162 | 169 |
| C5AR1     | 170 | 167 | 161 | 170 |
| CD19      | 171 | 179 | 201 | 171 |
| CCR2      | 172 | 172 | 177 | 172 |
| IL21      | 173 | 176 | 157 | 181 |
| TXNRD2    | 174 | 175 | 171 | 173 |
| GLS2      | 175 | 183 | 210 | 174 |
| CTGF      | 176 | 184 | 197 | 175 |
| CFLAR     | 177 | 181 | 219 | 176 |
| ZNF384    | 178 | 177 | 163 | 177 |
| SERPINA1  | 179 | 170 | 137 | 178 |
| PRNP      | 180 | 189 | 185 | 179 |
| MAPK3     | 181 | 195 | 264 | 180 |
| CD55      | 182 | 182 | 152 | 182 |
| AHR       | 183 | 185 | 187 | 183 |
| RFC4      | 184 | 174 | 140 | 184 |
| PTHLH     | 185 | 178 | 156 | 185 |
| GFAP      | 186 | 180 | 183 | 186 |
| CFTR      | 187 | 169 | 134 | 187 |
| ADIPOQ    | 188 | 187 | 212 | 188 |
| SORBS1    | 189 | 190 | 180 | 189 |
| SELL      | 190 | 198 | 253 | 190 |
| PLAUR     | 191 | 202 | 231 | 191 |
| NPY6R     | 192 | 197 | 223 | 192 |
| HSPB1     | 193 | 194 | 211 | 193 |
| ESR1      | 194 | 193 | 193 | 194 |
| SOCS3     | 195 | 204 | 237 | 195 |
| E2F1      | 196 | 186 | 189 | 196 |
| CD27      | 197 | 188 | 151 | 197 |
| FXN       | 198 | 191 | 170 | 198 |
| CDKN1A    | 199 | 192 | 182 | 199 |
| MUC1      | 200 | 203 | 204 | 200 |
| VIP       | 201 | 211 | 229 | 201 |
| SH2D1A    | 202 | 199 | 190 | 202 |
| NOS3      | 203 | 213 | 238 | 203 |

Sheet1

|           |     |     |     |     |
|-----------|-----|-----|-----|-----|
| MMP9      | 204 | 205 | 186 | 204 |
| FCER2     | 205 | 215 | 247 | 205 |
| CR1       | 206 | 212 | 208 | 206 |
| ANPEP     | 207 | 218 | 248 | 207 |
| VCAM1     | 208 | 221 | 257 | 208 |
| TXN       | 209 | 220 | 268 | 209 |
| THBS1     | 210 | 219 | 271 | 210 |
| IL23A     | 211 | 196 | 165 | 211 |
| ETS1      | 212 | 201 | 203 | 212 |
| TLR9      | 213 | 207 | 200 | 213 |
| SMAD3     | 214 | 206 | 191 | 214 |
| EIF2AK2   | 215 | 200 | 173 | 215 |
| CD47      | 216 | 210 | 159 | 216 |
| TNFRSF1A  | 217 | 217 | 220 | 217 |
| TNFRSF10B | 218 | 223 | 243 | 218 |
| ITGB1     | 219 | 230 | 290 | 219 |
| CD33      | 220 | 216 | 174 | 220 |
| MSMP      | 221 | 225 | 240 | 221 |
| ZAP70     | 222 | 249 | 298 | 222 |
| TLR3      | 223 | 222 | 235 | 223 |
| SMAD4     | 224 | 208 | 164 | 224 |
| MBTPS1    | 225 | 240 | 299 | 225 |
| JAK1      | 226 | 228 | 261 | 226 |
| ITGAL     | 227 | 250 | 339 | 227 |
| CALR      | 228 | 209 | 168 | 228 |
| XIAP      | 229 | 239 | 300 | 229 |
| STAT6     | 230 | 233 | 277 | 230 |
| MYD88     | 231 | 237 | 278 | 231 |
| FOXP3     | 232 | 227 | 234 | 232 |
| TFPI      | 233 | 232 | 233 | 233 |
| PTH       | 234 | 238 | 251 | 234 |
| CNOT6     | 235 | 246 | 289 | 235 |
| CCR3      | 236 | 236 | 273 | 236 |
| TFRC      | 237 | 245 | 239 | 237 |
| RUNX2     | 238 | 224 | 192 | 238 |
| POMC      | 239 | 231 | 209 | 239 |
| GAPDH     | 240 | 234 | 232 | 240 |
| FUT2      | 241 | 241 | 265 | 241 |
| FANCB     | 242 | 226 | 166 | 242 |
| APP       | 243 | 244 | 266 | 243 |
| RNASE3    | 244 | 242 | 241 | 244 |
| ENG       | 245 | 257 | 260 | 245 |
| SAA@      | 246 | 260 | 281 | 246 |
| PML       | 247 | 229 | 224 | 247 |
| MTX1      | 248 | 259 | 245 | 248 |
| CD82      | 249 | 252 | 230 | 249 |
| BGLAP     | 250 | 266 | 286 | 250 |
| BAK1      | 251 | 269 | 319 | 251 |
| TP73      | 252 | 268 | 297 | 252 |
| REG1A     | 253 | 248 | 194 | 253 |
| RAPGEF5   | 254 | 251 | 227 | 254 |

Sheet1

|           |     |     |     |     |
|-----------|-----|-----|-----|-----|
| PXN       | 255 | 265 | 262 | 255 |
| HSPD1     | 256 | 258 | 263 | 256 |
| HSP90B2P  | 257 | 267 | 279 | 257 |
| CR2       | 258 | 271 | 284 | 258 |
| CD63      | 259 | 262 | 221 | 259 |
| CCL20     | 260 | 254 | 242 | 260 |
| KDR       | 261 | 275 | 287 | 261 |
| FUT4      | 262 | 286 | 432 | 262 |
| TNFRSF1B  | 263 | 270 | 254 | 263 |
| TNFRSF10A | 264 | 256 | 236 | 264 |
| S100A12   | 265 | 264 | 259 | 265 |
| HR        | 266 | 253 | 216 | 266 |
| TRAF6     | 267 | 277 | 295 | 267 |
| THPO      | 268 | 287 | 307 | 268 |
| PTGS2     | 269 | 273 | 258 | 269 |
| POLD1     | 270 | 247 | 206 | 270 |
| FADD      | 271 | 274 | 292 | 271 |
| SNAP25    | 272 | 263 | 226 | 272 |
| NTRK1     | 273 | 261 | 207 | 273 |
| MT-ATP6   | 274 | 243 | 167 | 274 |
| JAK3      | 275 | 288 | 334 | 275 |
| HMGB1     | 276 | 291 | 309 | 276 |
| DYM       | 277 | 272 | 256 | 277 |
| DPP4      | 278 | 289 | 308 | 278 |
| CD58      | 279 | 290 | 338 | 279 |
| CCR1      | 280 | 282 | 329 | 280 |
| TBC1D9    | 281 | 278 | 270 | 281 |
| SOCS1     | 282 | 299 | 385 | 282 |
| SMAD2     | 283 | 285 | 301 | 283 |
| IL8RB     | 284 | 280 | 250 | 284 |
| CASP1     | 285 | 255 | 222 | 285 |
| RELA      | 286 | 302 | 405 | 286 |
| PVR       | 287 | 276 | 228 | 287 |
| PPARA     | 288 | 279 | 267 | 288 |
| PGF       | 289 | 300 | 340 | 289 |
| MSC       | 290 | 305 | 359 | 290 |
| IL27      | 291 | 292 | 291 | 291 |
| HDAC9     | 292 | 235 | 199 | 292 |
| CCL7      | 293 | 294 | 326 | 293 |
| REN       | 294 | 281 | 218 | 294 |
| IL9       | 295 | 307 | 374 | 295 |
| CCND3     | 296 | 304 | 328 | 296 |
| CBL       | 297 | 311 | 366 | 297 |
| B3GAT1    | 298 | 313 | 377 | 298 |
| SPN       | 299 | 310 | 333 | 299 |
| IL16      | 300 | 308 | 361 | 300 |
| FCGR2B    | 301 | 318 | 389 | 301 |
| CYP27A1   | 302 | 297 | 276 | 302 |
| CIITA     | 303 | 214 | 147 | 303 |
| C2        | 304 | 283 | 217 | 304 |
| TNFRSF25  | 305 | 293 | 255 | 305 |

Sheet1

|          |     |     |     |     |
|----------|-----|-----|-----|-----|
| SOD1     | 306 | 301 | 269 | 306 |
| SGCA     | 307 | 296 | 246 | 307 |
| ROS1     | 308 | 324 | 407 | 308 |
| PGPEP1   | 309 | 309 | 282 | 309 |
| FLT3     | 310 | 320 | 323 | 310 |
| CD59     | 311 | 316 | 303 | 311 |
| CD46     | 312 | 312 | 280 | 312 |
| CCL3     | 313 | 306 | 311 | 313 |
| TNPO1    | 314 | 321 | 337 | 314 |
| FGF7     | 315 | 319 | 318 | 315 |
| C4A      | 316 | 284 | 214 | 316 |
| TNFSF13B | 317 | 328 | 380 | 317 |
| TBP      | 318 | 322 | 305 | 318 |
| IRF1     | 319 | 298 | 272 | 319 |
| CEACAM1  | 320 | 315 | 275 | 320 |
| CD7      | 321 | 317 | 321 | 321 |
| ATM      | 322 | 314 | 304 | 322 |
| SELP     | 323 | 342 | 408 | 323 |
| REL      | 324 | 329 | 394 | 324 |
| LRPPRC   | 325 | 334 | 364 | 325 |
| KAT5     | 326 | 323 | 310 | 326 |
| IL1B     | 327 | 337 | 387 | 327 |
| ADCYAP1  | 328 | 332 | 351 | 328 |
| SFTPA1   | 329 | 295 | 244 | 329 |
| MAP4K4   | 330 | 330 | 347 | 330 |
| LPA      | 331 | 348 | 444 | 331 |
| CCND2    | 332 | 335 | 344 | 332 |
| VTN      | 333 | 338 | 324 | 333 |
| RARA     | 334 | 341 | 341 | 334 |
| MEFV     | 335 | 343 | 357 | 335 |
| MARK2    | 336 | 340 | 332 | 336 |
| IL8RA    | 337 | 346 | 365 | 337 |
| CCL21    | 338 | 350 | 393 | 338 |
| CCL17    | 339 | 333 | 369 | 339 |
| ADM      | 340 | 347 | 379 | 340 |
| SEA      | 341 | 344 | 335 | 341 |
| RBL2     | 342 | 345 | 342 | 342 |
| MYCN     | 343 | 303 | 249 | 343 |
| MAPK9    | 344 | 361 | 468 | 344 |
| ITGA4    | 345 | 372 | 492 | 345 |
| HLA-G    | 346 | 326 | 315 | 346 |
| CXCL11   | 347 | 349 | 399 | 347 |
| TJP1     | 348 | 327 | 293 | 348 |
| STAT5B   | 349 | 366 | 448 | 349 |
| RPE      | 350 | 325 | 274 | 350 |
| MMP2     | 351 | 356 | 375 | 351 |
| CD209    | 352 | 362 | 386 | 352 |
| CCR6     | 353 | 359 | 414 | 353 |
| CCL8     | 354 | 352 | 403 | 354 |
| BSG      | 355 | 354 | 327 | 355 |
| ATG5     | 356 | 336 | 296 | 356 |

Sheet1

|         |     |     |     |     |
|---------|-----|-----|-----|-----|
| THBD    | 357 | 363 | 352 | 357 |
| PF4     | 358 | 381 | 439 | 358 |
| MTTP    | 359 | 353 | 294 | 359 |
| FCGR1C  | 360 | 387 | 555 | 360 |
| CXCL1   | 361 | 375 | 452 | 361 |
| ZFP36   | 362 | 383 | 436 | 362 |
| TLR7    | 363 | 377 | 445 | 363 |
| TAS2R38 | 364 | 357 | 322 | 364 |
| SMAD7   | 365 | 382 | 462 | 365 |
| SETBP1  | 366 | 374 | 409 | 366 |
| S100A8  | 367 | 339 | 285 | 367 |
| NOD2    | 368 | 355 | 350 | 368 |
| MMP1    | 369 | 373 | 388 | 369 |
| MAP3K5  | 370 | 385 | 486 | 370 |
| LPL     | 371 | 367 | 355 | 371 |
| CTSD    | 372 | 369 | 345 | 372 |
| CCL19   | 373 | 384 | 447 | 373 |
| SMN1    | 374 | 351 | 288 | 374 |
| PTGIR   | 375 | 360 | 313 | 375 |
| IDO1    | 376 | 379 | 411 | 376 |
| CRS     | 377 | 368 | 353 | 377 |
| COX8A   | 378 | 371 | 343 | 378 |
| TACR1   | 379 | 392 | 396 | 379 |
| STAT4   | 380 | 365 | 331 | 380 |
| RUNX1   | 381 | 388 | 358 | 381 |
| RS1     | 382 | 358 | 306 | 382 |
| IL1A    | 383 | 378 | 378 | 383 |
| HLA-A   | 384 | 331 | 252 | 384 |
| CS      | 385 | 389 | 415 | 385 |
| SP3     | 386 | 394 | 430 | 386 |
| RELB    | 387 | 395 | 373 | 387 |
| MITF    | 388 | 370 | 312 | 388 |
| IRF3    | 389 | 376 | 346 | 389 |
| CCL4    | 390 | 397 | 473 | 390 |
| LAT2    | 391 | 409 | 465 | 391 |
| CX3CR1  | 392 | 393 | 384 | 392 |
| CD81    | 393 | 418 | 512 | 393 |
| TYRP1   | 394 | 386 | 317 | 394 |
| TPX2    | 395 | 403 | 382 | 395 |
| PSMD4   | 396 | 402 | 370 | 396 |
| PSMB7   | 397 | 380 | 302 | 397 |
| PDPK1   | 398 | 415 | 489 | 398 |
| OPN1MW  | 399 | 396 | 336 | 399 |
| NPS     | 400 | 364 | 283 | 400 |
| IRAK1   | 401 | 423 | 547 | 401 |
| GYPA    | 402 | 398 | 325 | 402 |
| GPI     | 403 | 413 | 457 | 403 |
| EGR1    | 404 | 411 | 467 | 404 |
| DKK1    | 405 | 400 | 381 | 405 |
| CNTF    | 406 | 410 | 446 | 406 |
| CDKN2D  | 407 | 417 | 485 | 407 |



Sheet1

|         |     |     |     |     |
|---------|-----|-----|-----|-----|
| CDH5    | 408 | 405 | 402 | 408 |
| UPK3B   | 409 | 412 | 437 | 409 |
| TYK2    | 410 | 424 | 481 | 410 |
| TNC     | 411 | 406 | 360 | 411 |
| DEFB4   | 412 | 404 | 413 | 412 |
| TAL1    | 413 | 391 | 330 | 413 |
| PLA2G1B | 414 | 407 | 368 | 414 |
| NR0B2   | 415 | 408 | 356 | 415 |
| LMLN    | 416 | 421 | 422 | 416 |
| IL3RA   | 417 | 442 | 495 | 417 |
| DPYD    | 418 | 390 | 354 | 418 |
| BIRC3   | 419 | 425 | 451 | 419 |
| TRADD   | 420 | 426 | 472 | 420 |
| THY1    | 421 | 446 | 466 | 421 |
| S100A6  | 422 | 414 | 349 | 422 |
| RNF130  | 423 | 420 | 363 | 423 |
| PPBP    | 424 | 432 | 427 | 424 |
| NPY     | 425 | 416 | 401 | 425 |
| IRF8    | 426 | 399 | 314 | 426 |
| CCL1    | 427 | 451 | 592 | 427 |
| TNFSF14 | 428 | 450 | 480 | 428 |
| TLR5    | 429 | 433 | 435 | 429 |
| TCIRG1  | 430 | 428 | 390 | 430 |
| SNCA    | 431 | 427 | 398 | 431 |
| PRKG1   | 432 | 431 | 417 | 432 |
| PAM     | 433 | 430 | 406 | 433 |
| ITGA2B  | 434 | 459 | 464 | 434 |
| HCK     | 435 | 457 | 476 | 435 |
| GCA     | 436 | 453 | 479 | 436 |
| F8      | 437 | 438 | 441 | 437 |
| CTSB    | 438 | 445 | 454 | 438 |
| CCL18   | 439 | 456 | 539 | 439 |
| TCF7L2  | 440 | 429 | 419 | 440 |
| SMS     | 441 | 458 | 502 | 441 |
| HSPA8   | 442 | 436 | 376 | 442 |
| GHR     | 443 | 452 | 420 | 443 |
| GAD1    | 444 | 441 | 425 | 444 |
| FBXO8   | 445 | 470 | 621 | 445 |
| C2ORF3  | 446 | 434 | 429 | 446 |
| ALK     | 447 | 467 | 494 | 447 |
| ADA     | 448 | 401 | 320 | 448 |
| STAT2   | 449 | 463 | 496 | 449 |
| SILV    | 450 | 449 | 397 | 450 |
| PSMD1   | 451 | 447 | 372 | 451 |
| MAF     | 452 | 474 | 514 | 452 |
| LTB     | 453 | 465 | 487 | 453 |
| HLA-B   | 454 | 419 | 348 | 454 |
| GNRH1   | 455 | 443 | 443 | 455 |
| EPCAM   | 456 | 460 | 434 | 456 |
| CXCR5   | 457 | 466 | 534 | 457 |
| CD163   | 458 | 475 | 519 | 458 |

Sheet1

|         |     |     |     |     |
|---------|-----|-----|-----|-----|
| CCL22   | 459 | 468 | 564 | 459 |
| CALCA   | 460 | 454 | 423 | 460 |
| SPHK1   | 461 | 481 | 520 | 461 |
| NTS     | 462 | 482 | 556 | 462 |
| MAPK7   | 463 | 485 | 553 | 463 |
| IL24    | 464 | 479 | 549 | 464 |
| IGF1    | 465 | 480 | 541 | 465 |
| DSP     | 466 | 492 | 615 | 466 |
| CDK5    | 467 | 473 | 470 | 467 |
| CD70    | 468 | 488 | 583 | 468 |
| AGRP    | 469 | 439 | 392 | 469 |
| WAS     | 470 | 472 | 412 | 470 |
| TSPYL2  | 471 | 484 | 500 | 471 |
| TNFSF15 | 472 | 497 | 593 | 472 |
| TNFRSF4 | 473 | 507 | 667 | 473 |
| S100B   | 474 | 486 | 509 | 474 |
| PSMD2   | 475 | 422 | 316 | 475 |
| PRTN3   | 476 | 496 | 458 | 476 |
| NOVA2   | 477 | 471 | 463 | 477 |
| KLRK1   | 478 | 435 | 391 | 478 |
| GIF     | 479 | 440 | 367 | 479 |
| DNTT    | 480 | 495 | 475 | 480 |
| CYBB    | 481 | 461 | 400 | 481 |
| CRKL    | 482 | 512 | 640 | 482 |
| CALCR   | 483 | 494 | 517 | 483 |
| BIRC2   | 484 | 448 | 404 | 484 |
| TNFSF13 | 485 | 511 | 573 | 485 |
| TERF1   | 486 | 487 | 460 | 486 |
| S100A4  | 487 | 498 | 488 | 487 |
| NOL3    | 488 | 506 | 497 | 488 |
| MUC2    | 489 | 489 | 482 | 489 |
| MICA    | 490 | 437 | 371 | 490 |
| LRRC23  | 491 | 502 | 526 | 491 |
| LOX     | 492 | 476 | 450 | 492 |
| IKBKG   | 493 | 469 | 438 | 493 |
| ID2     | 494 | 503 | 477 | 494 |
| DEFA1   | 495 | 462 | 428 | 495 |
| CXCR6   | 496 | 505 | 536 | 496 |
| CD1C    | 497 | 504 | 455 | 497 |
| SOCS2   | 498 | 514 | 571 | 498 |
| NR1H4   | 499 | 501 | 459 | 499 |
| NEUROD1 | 500 | 491 | 416 | 500 |
| MAP2K3  | 501 | 530 | 636 | 501 |
| IFI44   | 502 | 490 | 433 | 502 |
| FOSL1   | 503 | 528 | 641 | 503 |
| CCL16   | 504 | 517 | 516 | 504 |
| TNFRSF9 | 505 | 536 | 586 | 505 |
| TAP1    | 506 | 444 | 362 | 506 |
| SPAG11B | 507 | 521 | 503 | 507 |
| SMARCA4 | 508 | 520 | 538 | 508 |
| SLC3A2  | 509 | 513 | 426 | 509 |

Sheet1

|          |     |     |     |     |
|----------|-----|-----|-----|-----|
| RIPK2    | 510 | 455 | 418 | 510 |
| PSMD12   | 511 | 537 | 575 | 511 |
| PDIA3    | 512 | 499 | 440 | 512 |
| KLRD1    | 513 | 515 | 511 | 513 |
| KLRB1    | 514 | 483 | 449 | 514 |
| HPSE     | 515 | 544 | 619 | 515 |
| GAST     | 516 | 532 | 544 | 516 |
| EPX      | 517 | 540 | 624 | 517 |
| EIF4EBP1 | 518 | 509 | 490 | 518 |
| CYP2E1   | 519 | 523 | 529 | 519 |
| CYP1A2   | 520 | 477 | 395 | 520 |
| CFB      | 521 | 531 | 574 | 521 |
| CASP8    | 522 | 464 | 431 | 522 |
| ACR      | 523 | 547 | 684 | 523 |
| TLR8     | 524 | 545 | 664 | 524 |
| TIMM8A   | 525 | 510 | 442 | 525 |
| ST13     | 526 | 538 | 522 | 526 |
| SNORA63  | 527 | 533 | 499 | 527 |
| SLURP1   | 528 | 519 | 493 | 528 |
| PIAS1    | 529 | 518 | 461 | 529 |
| NRSN1    | 530 | 534 | 524 | 530 |
| NQO1     | 531 | 527 | 491 | 531 |
| ID1      | 532 | 555 | 633 | 532 |
| GADD45B  | 533 | 526 | 537 | 533 |
| DNMT1    | 534 | 524 | 501 | 534 |
| CRK      | 535 | 556 | 616 | 535 |
| COL1A2   | 536 | 522 | 471 | 536 |
| CFP      | 537 | 541 | 530 | 537 |
| CD24     | 538 | 549 | 525 | 538 |
| BCL2A1   | 539 | 542 | 521 | 539 |
| APOE     | 540 | 508 | 456 | 540 |
| WT1      | 541 | 565 | 589 | 541 |
| TSC22D3  | 542 | 554 | 558 | 542 |
| TMPO     | 543 | 546 | 532 | 543 |
| TBPL1    | 544 | 548 | 505 | 544 |
| SOX9     | 545 | 529 | 453 | 545 |
| SLAMF1   | 546 | 535 | 483 | 546 |
| NFATC2   | 547 | 571 | 723 | 547 |
| MLC1     | 548 | 539 | 474 | 548 |
| BIK      | 549 | 564 | 645 | 549 |
| TNFSF12  | 550 | 551 | 531 | 550 |
| RARS     | 551 | 567 | 570 | 551 |
| NLRP2    | 552 | 525 | 469 | 552 |
| LILRB1   | 553 | 516 | 410 | 553 |
| ICOS     | 554 | 576 | 734 | 554 |
| GLI3     | 555 | 559 | 581 | 555 |
| FGF1     | 556 | 588 | 779 | 556 |
| FBN2     | 557 | 563 | 540 | 557 |
| DDX58    | 558 | 557 | 565 | 558 |
| CXCL16   | 559 | 570 | 597 | 559 |
| CX3CL1   | 560 | 553 | 504 | 560 |

Sheet1

|          |     |     |     |     |
|----------|-----|-----|-----|-----|
| COL1A1   | 561 | 478 | 383 | 561 |
| CD244    | 562 | 543 | 545 | 562 |
| AVP      | 563 | 550 | 498 | 563 |
| YBX1     | 564 | 589 | 651 | 564 |
| SARS2    | 565 | 574 | 543 | 565 |
| RUNX3    | 566 | 573 | 533 | 566 |
| PCSK7    | 567 | 593 | 690 | 567 |
| OPA1     | 568 | 575 | 568 | 568 |
| MMP13    | 569 | 584 | 602 | 569 |
| KLF4     | 570 | 582 | 590 | 570 |
| IL20     | 571 | 562 | 582 | 571 |
| IL19     | 572 | 586 | 751 | 572 |
| HSP90B1  | 573 | 560 | 523 | 573 |
| EIF2AK3  | 574 | 594 | 708 | 574 |
| DMD      | 575 | 572 | 507 | 575 |
| DAPK1    | 576 | 580 | 631 | 576 |
| CCR8     | 577 | 587 | 719 | 577 |
| ARL4C    | 578 | 566 | 579 | 578 |
| AREG     | 579 | 596 | 706 | 579 |
| TNFRSF14 | 580 | 609 | 704 | 580 |
| SLC9A3   | 581 | 579 | 559 | 581 |
| SLC12A9  | 582 | 610 | 749 | 582 |
| SIT1     | 583 | 608 | 693 | 583 |
| RIT1     | 584 | 595 | 599 | 584 |
| PTX3     | 585 | 603 | 672 | 585 |
| PTGER4   | 586 | 583 | 527 | 586 |
| NCR1     | 587 | 558 | 548 | 587 |
| IGF2     | 588 | 493 | 424 | 588 |
| HBEGF    | 589 | 616 | 769 | 589 |
| EPRS     | 590 | 601 | 614 | 590 |
| DST      | 591 | 569 | 510 | 591 |
| CD48     | 592 | 581 | 562 | 592 |
| CCR10    | 593 | 591 | 678 | 593 |
| CCL13    | 594 | 600 | 739 | 594 |
| TSC2     | 595 | 623 | 689 | 595 |
| TRERF1   | 596 | 617 | 606 | 596 |
| SAG      | 597 | 615 | 670 | 597 |
| RNASE2   | 598 | 602 | 628 | 598 |
| POLE3    | 599 | 568 | 546 | 599 |
| OPN1SW   | 600 | 598 | 591 | 600 |
| MUC4     | 601 | 613 | 665 | 601 |
| MMP3     | 602 | 618 | 675 | 602 |
| LMOD1    | 603 | 619 | 647 | 603 |
| KLF5     | 604 | 624 | 679 | 604 |
| ITGA2    | 605 | 620 | 637 | 605 |
| IL1RN    | 606 | 590 | 576 | 606 |
| FCGRT    | 607 | 585 | 484 | 607 |
| CCR9     | 608 | 606 | 644 | 608 |
| WNT2     | 609 | 500 | 421 | 609 |
| TRH      | 610 | 578 | 508 | 610 |
| STAR     | 611 | 632 | 646 | 611 |

Sheet1

|           |     |     |     |     |
|-----------|-----|-----|-----|-----|
| SLC25A21  | 612 | 592 | 572 | 612 |
| S100A10   | 613 | 627 | 577 | 613 |
| MATK      | 614 | 631 | 617 | 614 |
| HAL       | 615 | 622 | 563 | 615 |
| CXCL6     | 616 | 625 | 630 | 616 |
| CEACAM6   | 617 | 612 | 594 | 617 |
| CD72      | 618 | 607 | 560 | 618 |
| CD274     | 619 | 605 | 629 | 619 |
| CCL26     | 620 | 634 | 648 | 620 |
| ACSS2     | 621 | 642 | 733 | 621 |
| ABCB1     | 622 | 614 | 550 | 622 |
| TSHR      | 623 | 648 | 714 | 623 |
| TRIM63    | 624 | 599 | 528 | 624 |
| TNFRSF10D | 625 | 649 | 764 | 625 |
| SLC9A1    | 626 | 633 | 634 | 626 |
| SLC20A1   | 627 | 650 | 686 | 627 |
| NOD1      | 628 | 628 | 639 | 628 |
| NCR3      | 629 | 552 | 518 | 629 |
| MX1       | 630 | 635 | 623 | 630 |
| LY96      | 631 | 621 | 609 | 631 |
| LAP3      | 632 | 647 | 643 | 632 |
| IL31      | 633 | 660 | 798 | 633 |
| HLA-DRB1  | 634 | 604 | 542 | 634 |
| GHRH      | 635 | 630 | 605 | 635 |
| DEFB103A  | 636 | 639 | 695 | 636 |
| DCD       | 637 | 644 | 658 | 637 |
| CYP3A     | 638 | 636 | 650 | 638 |
| TNFRSF6B  | 639 | 671 | 791 | 639 |
| SIRPA     | 640 | 643 | 569 | 640 |
| PRB1      | 641 | 640 | 635 | 641 |
| PPIA      | 642 | 645 | 610 | 642 |
| MVP       | 643 | 657 | 608 | 643 |
| MRAP      | 644 | 626 | 513 | 644 |
| MAEA      | 645 | 666 | 705 | 645 |
| IL12B     | 646 | 611 | 551 | 646 |
| HPS1      | 647 | 654 | 618 | 647 |
| EZH2      | 648 | 577 | 506 | 648 |
| CPE       | 649 | 656 | 654 | 649 |
| CES2      | 650 | 597 | 554 | 650 |
| CARM1     | 651 | 641 | 660 | 651 |
| WNT5A     | 652 | 662 | 649 | 652 |
| STMN1     | 653 | 637 | 567 | 653 |
| SRS       | 654 | 655 | 600 | 654 |
| SELE      | 655 | 691 | 776 | 655 |
| RHOJ      | 656 | 653 | 604 | 656 |
| PSMB8     | 657 | 561 | 478 | 657 |
| PRMT1     | 658 | 646 | 587 | 658 |
| POSTN     | 659 | 685 | 691 | 659 |
| OSTF1     | 660 | 672 | 668 | 660 |
| MYLK3     | 661 | 681 | 724 | 661 |
| MYLK      | 662 | 670 | 673 | 662 |

Sheet1

|          |     |     |     |     |
|----------|-----|-----|-----|-----|
| MPL      | 663 | 688 | 720 | 663 |
| ISG15    | 664 | 629 | 578 | 664 |
| IRF5     | 665 | 663 | 625 | 665 |
| IFNAR1   | 666 | 687 | 721 | 666 |
| HM13     | 667 | 675 | 687 | 667 |
| F2       | 668 | 638 | 515 | 668 |
| EEF1B3   | 669 | 668 | 595 | 669 |
| CYP27B1  | 670 | 678 | 666 | 670 |
| CNR2     | 671 | 661 | 584 | 671 |
| CA9      | 672 | 689 | 801 | 672 |
| TLR6     | 673 | 709 | 872 | 673 |
| SMARCA2  | 674 | 708 | 756 | 674 |
| RLN3     | 675 | 665 | 613 | 675 |
| PTPN2    | 676 | 706 | 787 | 676 |
| PTGER3   | 677 | 702 | 696 | 677 |
| PSMB9    | 678 | 664 | 694 | 678 |
| PRSS33   | 679 | 707 | 738 | 679 |
| PRCP     | 680 | 676 | 663 | 680 |
| MUC16    | 681 | 683 | 692 | 681 |
| ITGA6    | 682 | 679 | 552 | 682 |
| IFNGR1   | 683 | 652 | 535 | 683 |
| HLA-E    | 684 | 658 | 596 | 684 |
| FCGR2A   | 685 | 695 | 732 | 685 |
| E2F4     | 686 | 696 | 825 | 686 |
| CTSL1    | 687 | 674 | 601 | 687 |
| CSF1R    | 688 | 716 | 770 | 688 |
| CD52     | 689 | 703 | 712 | 689 |
| CD200    | 690 | 651 | 557 | 690 |
| CANX     | 691 | 686 | 598 | 691 |
| C3AR1    | 692 | 713 | 774 | 692 |
| B2M      | 693 | 701 | 748 | 693 |
| ADAM10   | 694 | 682 | 642 | 694 |
| XAF1     | 695 | 720 | 772 | 695 |
| TEAD1    | 696 | 705 | 677 | 696 |
| TCN1     | 697 | 700 | 683 | 697 |
| TCL1A    | 698 | 727 | 729 | 698 |
| SCGB1A1  | 699 | 710 | 698 | 699 |
| RAC2     | 700 | 715 | 731 | 700 |
| PRDM1    | 701 | 659 | 561 | 701 |
| IL7R     | 702 | 719 | 744 | 702 |
| ICOSLG   | 703 | 717 | 799 | 703 |
| GSR      | 704 | 684 | 622 | 704 |
| GREM1    | 705 | 677 | 611 | 705 |
| GORAB    | 706 | 724 | 753 | 706 |
| GCNT2    | 707 | 680 | 607 | 707 |
| GALT     | 708 | 704 | 655 | 708 |
| CSPG4    | 709 | 690 | 603 | 709 |
| TMEM132A | 710 | 731 | 741 | 710 |
| ST3GAL4  | 711 | 739 | 800 | 711 |
| SERPINH1 | 712 | 729 | 743 | 712 |
| PSMC1    | 713 | 711 | 638 | 713 |

Sheet1

|          |     |     |     |     |
|----------|-----|-----|-----|-----|
| NOX1     | 714 | 742 | 840 | 714 |
| NDUFA2   | 715 | 673 | 612 | 715 |
| MAG      | 716 | 694 | 580 | 716 |
| IL29     | 717 | 737 | 786 | 717 |
| IGKV4-1  | 718 | 735 | 757 | 718 |
| HLA-C    | 719 | 693 | 662 | 719 |
| ENTPD1   | 720 | 744 | 808 | 720 |
| CPOX     | 721 | 730 | 713 | 721 |
| CD226    | 722 | 698 | 653 | 722 |
| XCL1     | 723 | 740 | 736 | 723 |
| TRAF3IP2 | 724 | 765 | 857 | 724 |
| TPPP3    | 725 | 728 | 688 | 725 |
| TFCP2    | 726 | 752 | 785 | 726 |
| TBX21    | 727 | 697 | 620 | 727 |
| SST      | 728 | 743 | 718 | 728 |
| SRL      | 729 | 733 | 680 | 729 |
| SRGN     | 730 | 762 | 826 | 730 |
| RAB5A    | 731 | 768 | 818 | 731 |
| PKD2L1   | 732 | 749 | 775 | 732 |
| MTMR11   | 733 | 732 | 682 | 733 |
| ITFG1    | 734 | 746 | 758 | 734 |
| IPP      | 735 | 745 | 750 | 735 |
| IL23R    | 736 | 712 | 652 | 736 |
| IGFBP1   | 737 | 714 | 626 | 737 |
| HMMR     | 738 | 692 | 566 | 738 |
| CTSS     | 739 | 667 | 588 | 739 |
| CHM      | 740 | 722 | 657 | 740 |
| AQP1     | 741 | 734 | 699 | 741 |
| AAAS     | 742 | 723 | 700 | 742 |
| WNT1     | 743 | 721 | 685 | 743 |
| VIT      | 744 | 776 | 866 | 744 |
| TYMP     | 745 | 747 | 697 | 745 |
| TP53BP1  | 746 | 726 | 681 | 746 |
| TFDP1    | 747 | 769 | 767 | 747 |
| TAOK2    | 748 | 764 | 726 | 748 |
| SMARCB1  | 749 | 759 | 742 | 749 |
| RHD      | 750 | 753 | 707 | 750 |
| PSMB5    | 751 | 669 | 585 | 751 |
| PLN      | 752 | 738 | 676 | 752 |
| MAP3K4   | 753 | 754 | 771 | 753 |
| MAP2K2   | 754 | 771 | 790 | 754 |
| LIN9     | 755 | 751 | 737 | 755 |
| FANCA    | 756 | 755 | 747 | 756 |
| ERMAP    | 757 | 736 | 659 | 757 |
| E2F2     | 758 | 748 | 778 | 758 |
| DR1      | 759 | 750 | 674 | 759 |
| CYSLTR1  | 760 | 699 | 669 | 760 |
| CTNBL1   | 761 | 766 | 735 | 761 |
| CTD      | 762 | 756 | 716 | 762 |
| CSH1     | 763 | 760 | 730 | 763 |
| CHAT     | 764 | 741 | 627 | 764 |

Sheet1

|           |     |     |     |     |
|-----------|-----|-----|-----|-----|
| CD74      | 765 | 772 | 811 | 765 |
| SCN10A    | 766 | 785 | 827 | 766 |
| PYCARD    | 767 | 761 | 661 | 767 |
| PTPRN     | 768 | 774 | 754 | 768 |
| NR5A2     | 769 | 773 | 717 | 769 |
| NPPC      | 770 | 767 | 671 | 770 |
| NMI       | 771 | 718 | 656 | 771 |
| GAD2      | 772 | 758 | 715 | 772 |
| DDR1      | 773 | 779 | 804 | 773 |
| ADC       | 774 | 781 | 789 | 774 |
| TNFRSF13B | 775 | 809 | 845 | 775 |
| TJP2      | 776 | 770 | 725 | 776 |
| SRA1      | 777 | 786 | 768 | 777 |
| SOD3      | 778 | 798 | 836 | 778 |
| SLC11A1   | 779 | 784 | 727 | 779 |
| SERPINF2  | 780 | 804 | 847 | 780 |
| SCD5      | 781 | 800 | 824 | 781 |
| RORC      | 782 | 777 | 701 | 782 |
| RHBDL1    | 783 | 780 | 752 | 783 |
| MXD1      | 784 | 782 | 760 | 784 |
| MT1E      | 785 | 799 | 795 | 785 |
| LAMP1     | 786 | 811 | 849 | 786 |
| INSL3     | 787 | 763 | 632 | 787 |
| IL6R      | 788 | 791 | 759 | 788 |
| IFI16     | 789 | 757 | 728 | 789 |
| F11R      | 790 | 807 | 858 | 790 |
| CD1D      | 791 | 797 | 796 | 791 |
| CADM1     | 792 | 801 | 813 | 792 |
| C1R       | 793 | 778 | 792 | 793 |
| BAG4      | 794 | 790 | 794 | 794 |
| BACE1     | 795 | 789 | 793 | 795 |
| ADCY10    | 796 | 788 | 820 | 796 |
| VHLL      | 797 | 824 | 888 | 797 |
| TNFRSF21  | 798 | 803 | 783 | 798 |
| PDCD1LG2  | 799 | 794 | 832 | 799 |
| MFGE8     | 800 | 827 | 881 | 800 |
| MCS       | 801 | 795 | 740 | 801 |
| IK        | 802 | 820 | 821 | 802 |
| IFITM1    | 803 | 812 | 782 | 803 |
| FOXM1     | 804 | 825 | 941 | 804 |
| FAAH      | 805 | 805 | 761 | 805 |
| EXOSC3    | 806 | 793 | 711 | 806 |
| DLGAP3    | 807 | 828 | 935 | 807 |
| CPZ       | 808 | 802 | 773 | 808 |
| C4B       | 809 | 796 | 763 | 809 |
| C1S       | 810 | 783 | 755 | 810 |
| C1QBP     | 811 | 815 | 816 | 811 |
| BTG3      | 812 | 814 | 841 | 812 |
| TOR1A     | 813 | 816 | 788 | 813 |
| TCN2      | 814 | 833 | 859 | 814 |
| SATB1     | 815 | 819 | 766 | 815 |



Sheet1

|          |     |     |     |     |
|----------|-----|-----|-----|-----|
| RFX5     | 816 | 725 | 722 | 816 |
| PPY      | 817 | 792 | 703 | 817 |
| NDC80    | 818 | 823 | 802 | 818 |
| NCF2     | 819 | 810 | 803 | 819 |
| LILRB4   | 820 | 830 | 863 | 820 |
| IL32     | 821 | 844 | 897 | 821 |
| GNLY     | 822 | 838 | 929 | 822 |
| GADD45G  | 823 | 832 | 871 | 823 |
| FANCC    | 824 | 826 | 831 | 824 |
| ERVWE1   | 825 | 829 | 797 | 825 |
| ERAP1    | 826 | 808 | 709 | 826 |
| EEC1     | 827 | 839 | 882 | 827 |
| DFFA     | 828 | 841 | 873 | 828 |
| CPM      | 829 | 843 | 913 | 829 |
| COP      | 830 | 821 | 777 | 830 |
| CHRD1    | 831 | 835 | 815 | 831 |
| CD276    | 832 | 822 | 807 | 832 |
| TTRAP    | 833 | 856 | 908 | 833 |
| TST      | 834 | 775 | 710 | 834 |
| SKI      | 835 | 852 | 886 | 835 |
| PER1     | 836 | 845 | 784 | 836 |
| MNT      | 837 | 855 | 910 | 837 |
| IL26     | 838 | 851 | 898 | 838 |
| HOXA10   | 839 | 787 | 702 | 839 |
| DSC3     | 840 | 849 | 829 | 840 |
| CLEC4C   | 841 | 862 | 942 | 841 |
| CD300A   | 842 | 853 | 899 | 842 |
| BAMBI    | 843 | 850 | 867 | 843 |
| AIRN     | 844 | 813 | 765 | 844 |
| AIF1     | 845 | 858 | 885 | 845 |
| TXK      | 846 | 885 | 952 | 846 |
| TBCE     | 847 | 879 | 934 | 847 |
| TAAR1    | 848 | 880 | 927 | 848 |
| SFRS8    | 849 | 884 | 946 | 849 |
| SERPING1 | 850 | 864 | 842 | 850 |
| SEPP1    | 851 | 865 | 904 | 851 |
| RPE65    | 852 | 817 | 745 | 852 |
| PHF11    | 853 | 876 | 939 | 853 |
| NP       | 854 | 846 | 781 | 854 |
| MOG      | 855 | 873 | 918 | 855 |
| MBD1     | 856 | 857 | 762 | 856 |
| MAA      | 857 | 867 | 833 | 857 |
| KLRC1    | 858 | 872 | 864 | 858 |
| IREB2    | 859 | 840 | 852 | 859 |
| HLA-F    | 860 | 834 | 809 | 860 |
| HAS2     | 861 | 863 | 805 | 861 |
| HAMP     | 862 | 878 | 902 | 862 |
| GEN1     | 863 | 837 | 812 | 863 |
| EMB      | 864 | 871 | 850 | 864 |
| DNAJA3   | 865 | 882 | 916 | 865 |
| DAPK2    | 866 | 883 | 924 | 866 |

Sheet1

|           |     |     |      |     |
|-----------|-----|-----|------|-----|
| CASP4     | 867 | 806 | 746  | 867 |
| ADAR      | 868 | 854 | 830  | 868 |
| ACO1      | 869 | 842 | 865  | 869 |
| ZBP1      | 870 | 896 | 911  | 870 |
| ULBP1     | 871 | 861 | 817  | 871 |
| TNFRSF12A | 872 | 903 | 919  | 872 |
| TLX1NB    | 873 | 912 | 930  | 873 |
| TFP       | 874 | 916 | 938  | 874 |
| TAP2      | 875 | 848 | 838  | 875 |
| SLN       | 876 | 898 | 883  | 876 |
| SIGLEC1   | 877 | 895 | 837  | 877 |
| PORCN     | 878 | 906 | 890  | 878 |
| POF1B     | 879 | 847 | 780  | 879 |
| PLEKHO1   | 880 | 836 | 819  | 880 |
| PIGR      | 881 | 914 | 960  | 881 |
| NT5C2     | 882 | 900 | 862  | 882 |
| NOTCH2    | 883 | 908 | 876  | 883 |
| MST1R     | 884 | 888 | 834  | 884 |
| MSLN      | 885 | 889 | 856  | 885 |
| MAK       | 886 | 904 | 905  | 886 |
| KLK4      | 887 | 890 | 843  | 887 |
| KCNJ5     | 888 | 902 | 889  | 888 |
| INSRR     | 889 | 909 | 928  | 889 |
| IMMT      | 890 | 860 | 810  | 890 |
| HSPA1B    | 891 | 891 | 854  | 891 |
| HIST2H2AC | 892 | 897 | 884  | 892 |
| FKBP3     | 893 | 893 | 848  | 893 |
| DUOX2     | 894 | 875 | 846  | 894 |
| DEFA6     | 895 | 859 | 855  | 895 |
| DAPK3     | 896 | 910 | 958  | 896 |
| CEACAM7   | 897 | 887 | 892  | 897 |
| AVIL      | 898 | 920 | 977  | 898 |
| USP9X     | 899 | 874 | 806  | 899 |
| TNIP1     | 900 | 905 | 879  | 900 |
| SYNM      | 901 | 922 | 851  | 901 |
| SLAMF6    | 902 | 917 | 932  | 902 |
| SLA       | 903 | 929 | 957  | 903 |
| RFXANK    | 904 | 818 | 822  | 904 |
| PSMB10    | 905 | 870 | 877  | 905 |
| PSAP      | 906 | 932 | 909  | 906 |
| PROX1     | 907 | 931 | 893  | 907 |
| PDE6B     | 908 | 901 | 869  | 908 |
| MNDA      | 909 | 866 | 814  | 909 |
| MCRS1     | 910 | 907 | 878  | 910 |
| LY86      | 911 | 918 | 891  | 911 |
| KRT31     | 912 | 936 | 956  | 912 |
| IL1R2     | 913 | 869 | 828  | 913 |
| IL12RB1   | 914 | 915 | 907  | 914 |
| IFT122    | 915 | 942 | 1032 | 915 |
| HYOU1     | 916 | 923 | 914  | 916 |
| HERPUD1   | 917 | 926 | 900  | 917 |

Sheet1

|           |     |     |      |     |
|-----------|-----|-----|------|-----|
| FXVD1     | 918 | 930 | 925  | 918 |
| E2F5      | 919 | 921 | 921  | 919 |
| DEFA5     | 920 | 881 | 868  | 920 |
| DDX53     | 921 | 928 | 923  | 921 |
| CDK5R2    | 922 | 927 | 950  | 922 |
| CCRL2     | 923 | 940 | 954  | 923 |
| CCL3L1    | 924 | 938 | 1053 | 924 |
| AOC3      | 925 | 919 | 901  | 925 |
| YARS      | 926 | 877 | 823  | 926 |
| WNT10B    | 927 | 911 | 880  | 927 |
| WNT10A    | 928 | 868 | 870  | 928 |
| UBD       | 929 | 913 | 844  | 929 |
| THOC1     | 930 | 949 | 955  | 930 |
| SLC9A2    | 931 | 944 | 936  | 931 |
| RAE1      | 932 | 946 | 887  | 932 |
| PSME2     | 933 | 933 | 875  | 933 |
| PRSS27    | 934 | 943 | 895  | 934 |
| PPL       | 935 | 948 | 933  | 935 |
| PLK4      | 936 | 955 | 979  | 936 |
| PDZK1IP1  | 937 | 951 | 974  | 937 |
| PCK1      | 938 | 957 | 1012 | 938 |
| NTM       | 939 | 956 | 951  | 939 |
| NTF3      | 940 | 953 | 981  | 940 |
| MT-ND2    | 941 | 941 | 874  | 941 |
| LTA4H     | 942 | 935 | 920  | 942 |
| KRT3      | 943 | 959 | 961  | 943 |
| HEPH      | 944 | 960 | 972  | 944 |
| H19       | 945 | 831 | 839  | 945 |
| FANCE     | 946 | 954 | 926  | 946 |
| DSTN      | 947 | 958 | 984  | 947 |
| COL3A1    | 948 | 945 | 903  | 948 |
| COL2A1    | 949 | 939 | 861  | 949 |
| CLEC2D    | 950 | 950 | 968  | 950 |
| AIM2      | 951 | 899 | 835  | 951 |
| WNT6      | 952 | 894 | 894  | 952 |
| WARS2     | 953 | 925 | 853  | 953 |
| WARS      | 954 | 970 | 966  | 954 |
| UBE2L6    | 955 | 962 | 922  | 955 |
| TH1L      | 956 | 993 | 990  | 956 |
| STT3A     | 957 | 979 | 969  | 957 |
| SNORD3B-1 | 958 | 989 | 995  | 958 |
| SMN2      | 959 | 964 | 945  | 959 |
| SLC5A8    | 960 | 971 | 947  | 960 |
| SLC25A6   | 961 | 991 | 997  | 961 |
| SFRS11    | 962 | 966 | 906  | 962 |
| RTL1      | 963 | 995 | 1003 | 963 |
| RFXAP     | 964 | 886 | 1007 | 964 |
| PPARD     | 965 | 978 | 970  | 965 |
| PDIA6     | 966 | 972 | 940  | 966 |
| MYL4      | 967 | 984 | 1019 | 967 |
| MTAP      | 968 | 968 | 937  | 968 |

Sheet1

|          |      |      |      |      |
|----------|------|------|------|------|
| MLPH     | 969  | 990  | 975  | 969  |
| MLLT1    | 970  | 952  | 948  | 970  |
| MAGEA3   | 971  | 992  | 1024 | 971  |
| LGALS3BP | 972  | 987  | 982  | 972  |
| KPNA2    | 973  | 967  | 931  | 973  |
| IFIT1    | 974  | 977  | 971  | 974  |
| IFI35    | 975  | 924  | 912  | 975  |
| IFI30    | 976  | 969  | 1035 | 976  |
| HLCS     | 977  | 983  | 964  | 977  |
| HCST     | 978  | 976  | 963  | 978  |
| HAVCR2   | 979  | 988  | 983  | 979  |
| GPR77    | 980  | 973  | 953  | 980  |
| GJD2     | 981  | 947  | 915  | 981  |
| FMOD     | 982  | 981  | 943  | 982  |
| EXOSC10  | 983  | 985  | 1043 | 983  |
| EIF4B    | 984  | 974  | 965  | 984  |
| DPT      | 985  | 892  | 860  | 985  |
| DEFA4    | 986  | 975  | 1045 | 986  |
| CYSLTR2  | 987  | 961  | 1047 | 987  |
| CSF2RB   | 988  | 996  | 1048 | 988  |
| CD93     | 989  | 980  | 962  | 989  |
| APOBEC3G | 990  | 986  | 1057 | 990  |
| ACLY     | 991  | 982  | 980  | 991  |
| TPMT     | 992  | 1007 | 973  | 992  |
| ST4      | 993  | 1017 | 991  | 993  |
| SNRPN    | 994  | 934  | 994  | 994  |
| SLC25A24 | 995  | 1010 | 998  | 995  |
| SFTPA2   | 996  | 965  | 999  | 996  |
| RAP2B    | 997  | 1006 | 1009 | 997  |
| PTGDR    | 998  | 1001 | 959  | 998  |
| PHKA2    | 999  | 1012 | 978  | 999  |
| PAICS    | 1000 | 1014 | 1013 | 1000 |
| NUP98    | 1001 | 1009 | 1015 | 1001 |
| NGB      | 1002 | 1015 | 1017 | 1002 |
| MGAT5    | 1003 | 1016 | 1022 | 1003 |
| LYPLA2P1 | 1004 | 937  | 896  | 1004 |
| IL18BP   | 1005 | 999  | 949  | 1005 |
| IFNA2    | 1006 | 997  | 1033 | 1006 |
| HTRA1    | 1007 | 1004 | 967  | 1007 |
| HLX      | 1008 | 998  | 944  | 1008 |
| GOLM1    | 1009 | 1000 | 1037 | 1009 |
| GLS      | 1010 | 1003 | 1038 | 1010 |
| GBP1     | 1011 | 1011 | 1041 | 1011 |
| CRYGEP1  | 1012 | 1002 | 976  | 1012 |
| CHGA     | 1013 | 1013 | 1050 | 1013 |
| CFHR1    | 1014 | 1005 | 1051 | 1014 |
| CASP7    | 1015 | 994  | 1054 | 1015 |
| CASP5    | 1016 | 963  | 917  | 1016 |
| AMCN     | 1017 | 1008 | 1058 | 1017 |
| ZXDC     | 1018 | 1021 | 985  | 1018 |
| USE1     | 1019 | 1039 | 987  | 1019 |

Sheet1

|         |      |      |      |      |
|---------|------|------|------|------|
| TREM2   | 1020 | 1031 | 988  | 1020 |
| TPBG    | 1021 | 1033 | 989  | 1021 |
| SPATA2  | 1022 | 1022 | 992  | 1022 |
| SP140   | 1023 | 1024 | 993  | 1023 |
| SECTM1  | 1024 | 1026 | 1000 | 1024 |
| SART3   | 1025 | 1019 | 1001 | 1025 |
| RSL1D1  | 1026 | 1032 | 1004 | 1026 |
| RPAP3   | 1027 | 1027 | 1005 | 1027 |
| PNKD    | 1028 | 1035 | 1011 | 1028 |
| ODF1    | 1029 | 1025 | 1014 | 1029 |
| NTF4    | 1030 | 1028 | 1016 | 1030 |
| MFAP2   | 1031 | 1038 | 1023 | 1031 |
| LST1    | 1032 | 1018 | 1025 | 1032 |
| LAD1    | 1033 | 1040 | 1027 | 1033 |
| IL1F9   | 1034 | 1036 | 1031 | 1034 |
| HSPA1L  | 1035 | 1029 | 1036 | 1035 |
| GCHFR   | 1036 | 1037 | 1039 | 1036 |
| GBP2    | 1037 | 1023 | 1040 | 1037 |
| FZD5    | 1038 | 1030 | 1042 | 1038 |
| CARD17  | 1039 | 1020 | 1055 | 1039 |
| ABCD3   | 1040 | 1034 | 1059 | 1040 |
| WNT9B   | 1041 | 1041 | 986  | 1041 |
| SLC7A7  | 1042 | 1042 | 996  | 1042 |
| RTN4IP1 | 1043 | 1043 | 1002 | 1043 |
| ROM1    | 1044 | 1044 | 1006 | 1044 |
| RARRES3 | 1045 | 1045 | 1008 | 1045 |
| POMP    | 1046 | 1046 | 1010 | 1046 |
| MYO1G   | 1047 | 1047 | 1018 | 1047 |
| MRPL13  | 1048 | 1048 | 1020 | 1048 |
| MLN     | 1049 | 1049 | 1021 | 1049 |
| LOXL4   | 1050 | 1050 | 1026 | 1050 |
| KRT6B   | 1051 | 1051 | 1028 | 1051 |
| KLRC2   | 1052 | 1052 | 1029 | 1052 |
| KIR2DL4 | 1053 | 1053 | 1030 | 1053 |
| IFI44L  | 1054 | 1054 | 1034 | 1054 |
| DGKQ    | 1055 | 1055 | 1044 | 1055 |
| DAP3    | 1056 | 1056 | 1046 | 1056 |
| CIRBP   | 1057 | 1057 | 1049 | 1057 |
| CDV3    | 1058 | 1058 | 1052 | 1058 |
| C3ORF52 | 1059 | 1059 | 1056 | 1059 |
