# Supplementary material
Source: PubMed Central journal article supplement (PMC2896678)
Supplement: 426479.f3.pdf [file 426479.f3.pdf]

Sheet1

| Gene    | Degree | Eigenvector | Betweenness | Closeness |
|---------|--------|-------------|-------------|-----------|
| IL2     | 1      | 1           | 1           | 1         |
| TNF     | 2      | 3           | 2           | 7         |
| IL6     | 3      | 4           | 7           | 3         |
| IL4     | 4      | 2           | 4           | 4         |
| IL5     | 5      | 7           | 20          | 8         |
| IL10    | 6      | 8           | 11          | 2         |
| CSF2    | 7      | 6           | 6           | 6         |
| IL13    | 8      | 9           | 5           | 5         |
| CD4     | 9      | 5           | 3           | 12        |
| IL8     | 10     | 13          | 10          | 9         |
| IL7     | 11     | 14          | 12          | 17        |
| EIF2AK2 | 12     | 10          | 8           | 46        |
| CD28    | 13     | 12          | 34          | 53        |
| HSPD1   | 14     | 19          | 16          | 14        |
| SILV    | 15     | 20          | 17          | 23        |
| IL21    | 16     | 17          | 37          | 65        |
| IL18    | 17     | 45          | 36          | 10        |
| HBEGF   | 18     | 25          | 35          | 21        |
| CD46    | 19     | 11          | 9           | 40        |
| CD40    | 20     | 16          | 32          | 51        |
| PSG2    | 21     | 46          | 22          | 26        |
| GAD1    | 22     | 62          | 77          | 18        |
| IL15    | 23     | 63          | 70          | 22        |
| C3      | 24     | 15          | 31          | 66        |
| PRF1    | 25     | 22          | 19          | 55        |
| TNFRSF9 | 26     | 50          | 38          | 56        |
| RNASE3  | 27     | 57          | 39          | 37        |
| NFKB1   | 28     | 23          | 28          | 48        |
| INS     | 29     | 61          | 69          | 16        |
| IFNA1   | 30     | 52          | 33          | 13        |
| GNLY    | 31     | 48          | 13          | 19        |
| CD8A    | 32     | 51          | 89          | 20        |
| CD86    | 33     | 44          | 21          | 57        |
| CD80    | 34     | 55          | 91          | 24        |
| CD40LG  | 35     | 21          | 18          | 52        |
| ZNF384  | 36     | 58          | 26          | 47        |
| ZAP70   | 37     | 18          | 23          | 81        |
| TPBG    | 38     | 71          | 43          | 11        |
| PTPN11  | 39     | 56          | 14          | 54        |
| CRP     | 40     | 60          | 27          | 41        |
| MUC16   | 41     | 70          | 61          | 28        |
| MAPK8   | 42     | 49          | 15          | 70        |
| MAPK14  | 43     | 64          | 65          | 49        |
| LTA     | 44     | 59          | 29          | 25        |
| KLK3    | 45     | 69          | 68          | 15        |
| ISG20   | 46     | 73          | 40          | 38        |
| ICAM1   | 47     | 65          | 74          | 42        |
| HSPA4   | 48     | 53          | 25          | 61        |
| CSF3    | 49     | 66          | 86          | 43        |
| CR1     | 50     | 54          | 87          | 67        |

Sheet1

|          |     |     |     |     |
|----------|-----|-----|-----|-----|
| CD34     | 51  | 67  | 93  | 39  |
| CCR5     | 52  | 47  | 24  | 58  |
| CCL5     | 53  | 24  | 30  | 75  |
| TYRP1    | 54  | 93  | 41  | 27  |
| TSHR     | 55  | 26  | 42  | 84  |
| TNFSF10  | 56  | 27  | 44  | 85  |
| TNFRSF25 | 57  | 28  | 45  | 86  |
| TNC      | 58  | 29  | 46  | 87  |
| TLR9     | 59  | 30  | 47  | 88  |
| TLR5     | 60  | 31  | 48  | 89  |
| TLR2     | 61  | 82  | 49  | 73  |
| TCIRG1   | 62  | 32  | 50  | 90  |
| STAT6    | 63  | 90  | 51  | 44  |
| SNORA62  | 64  | 98  | 52  | 33  |
| SLAMF1   | 65  | 80  | 53  | 68  |
| SGCA     | 66  | 33  | 54  | 91  |
| SCYL1    | 67  | 86  | 55  | 59  |
| SAA@     | 68  | 79  | 56  | 69  |
| RNF130   | 69  | 78  | 57  | 72  |
| PSMB5    | 70  | 34  | 58  | 92  |
| NOS2     | 71  | 87  | 59  | 60  |
| NCAM1    | 72  | 99  | 60  | 34  |
| MUC1     | 73  | 35  | 62  | 93  |
| MTX1     | 74  | 92  | 63  | 50  |
| MBP      | 75  | 100 | 64  | 35  |
| MAPK1    | 76  | 68  | 66  | 83  |
| LTB      | 77  | 77  | 67  | 63  |
| IDO1     | 78  | 94  | 71  | 29  |
| ID2      | 79  | 36  | 72  | 94  |
| ID1      | 80  | 37  | 73  | 95  |
| HSP90B2P | 81  | 76  | 75  | 79  |
| GH1      | 82  | 88  | 76  | 62  |
| FLT3     | 83  | 38  | 78  | 96  |
| FAS      | 84  | 39  | 79  | 97  |
| EXOSC3   | 85  | 40  | 80  | 98  |
| ERVWE1   | 86  | 95  | 81  | 30  |
| ERBB2    | 87  | 101 | 82  | 36  |
| EIF2AK3  | 88  | 84  | 83  | 71  |
| CXCR4    | 89  | 74  | 84  | 77  |
| CXCL10   | 90  | 91  | 85  | 45  |
| CFP      | 91  | 96  | 88  | 31  |
| CD83     | 92  | 85  | 90  | 78  |
| CD55     | 93  | 75  | 92  | 80  |
| CD27     | 94  | 83  | 94  | 76  |
| CD209    | 95  | 81  | 95  | 74  |
| CCL2     | 96  | 72  | 96  | 82  |
| CALR     | 97  | 89  | 97  | 64  |
| CA9      | 98  | 97  | 98  | 32  |
| BCR      | 99  | 41  | 99  | 99  |
| BAX      | 100 | 42  | 100 | 100 |
| BAK1     | 101 | 43  | 101 | 101 |
